# Supplementary material for: The Expression and Effection of MicroRNA-499a in High-Tobacco Exposed Head and Neck Squamous Cell Carcinoma: A Bioinformatic Analysis
Source: Front Oncol. 2019 Jul 31;9:678. doi: 10.3389/fonc.2019.00678 (PMC6685408; doi:10.3389/fonc.2019.00678)
Supplement: Supplementary file 7 [file Table_7.XLSX]

## Sheet: Supplementary Table
Supplementary Table 7. The gene list of four significant modules.
Modules	genes
lightsteelblue1	ACAP3
lightsteelblue1	ALDH3B2
lightsteelblue1	ATP6V0D1
lightsteelblue1	CAPNS2
lightsteelblue1	CASP1
lightsteelblue1	CDKN2B
lightsteelblue1	CEACAM19
lightsteelblue1	CST6
lightsteelblue1	CYTH2
lightsteelblue1	DEFB1
lightsteelblue1	DMKN
lightsteelblue1	DSC1
lightsteelblue1	FABP5
lightsteelblue1	FAM192A
lightsteelblue1	GPR157
lightsteelblue1	GRIN2D
lightsteelblue1	GSDMA
lightsteelblue1	GSDMC
lightsteelblue1	HES2
lightsteelblue1	ITM2B
lightsteelblue1	JOSD2
lightsteelblue1	KATNB1
lightsteelblue1	KLK10
lightsteelblue1	KLK11
lightsteelblue1	KLK7
lightsteelblue1	KLK8
lightsteelblue1	KRT10
lightsteelblue1	KRT16
lightsteelblue1	KRT6B
lightsteelblue1	KRT6C
lightsteelblue1	KRTDAP
lightsteelblue1	MBD1
lightsteelblue1	NABP1
lightsteelblue1	NAPA
lightsteelblue1	NDEL1
lightsteelblue1	NEAT1
lightsteelblue1	NOD2
lightsteelblue1	NOL3
lightsteelblue1	NUP58
lightsteelblue1	NUPR1
lightsteelblue1	PDZK1IP1
lightsteelblue1	PEX6
lightsteelblue1	PGLYRP4
lightsteelblue1	PLCH2
lightsteelblue1	PPFIA3
lightsteelblue1	RAB2A
lightsteelblue1	RBM42
lightsteelblue1	RDH13
lightsteelblue1	RNASE7
lightsteelblue1	S100A7
lightsteelblue1	S100A7A
lightsteelblue1	S100A8
lightsteelblue1	S100A9
lightsteelblue1	SDR16C5
lightsteelblue1	SDR9C7
lightsteelblue1	SERPINB4
lightsteelblue1	SERPINB7
lightsteelblue1	SLURP1
lightsteelblue1	SPRR2G
lightsteelblue1	STX4
lightsteelblue1	SYTL1
lightsteelblue1	TMEM147
lightsteelblue1	TMEM45A
lightsteelblue1	TRADD
lightsteelblue1	TYMP
lightsteelblue1	USF2
lightsteelblue1	USP12
lightsteelblue1	VMP1
lightsteelblue1	WFDC5
lightsteelblue1	ZC3H12A
lightsteelblue1	ZNF812P
tan	A2ML1
tan	ABAT
tan	ABCA12
tan	ABI1
tan	ABLIM1
tan	ACAA1
tan	ADAMTSL4
tan	ADAP2
tan	AFMID
tan	AGPAT5
tan	AKIRIN2
tan	ALOX15B
tan	ANKRD10
tan	ANKRD22
tan	ANXA1
tan	ANXA2
tan	ANXA7
tan	AP002761.4
tan	APOBEC3A
tan	APOL1
tan	APOL2
tan	ARHGEF10L
tan	ARHGEF3
tan	ARL4D
tan	ARL5B
tan	ARPIN
tan	ATP6V0A1
tan	ATP6V0C
tan	ATXN7L3
tan	B3GNT8
tan	BCL3
tan	BDH1
tan	BNIPL
tan	BOK
tan	C10orf99
tan	C1orf116
tan	C1orf74
tan	C6orf132
tan	CADM4
tan	CCDC88B
tan	CDH1
tan	CDK5R1
tan	CDR2L
tan	CEACAM1
tan	CELSR3
tan	CEMIP
tan	CERS3
tan	CES2
tan	CGN
tan	CNOT11
tan	COA3
tan	CPED1
tan	CPPED1
tan	CRCT1
tan	CRYBG2
tan	CSTA
tan	CSTB
tan	CTSC
tan	CUL3
tan	CXCL17
tan	CYB5A
tan	CYB5R2
tan	CYSRT1
tan	DAPP1
tan	DCUN1D3
tan	DEPTOR
tan	DHRS9
tan	DPP4
tan	DPYD
tan	DUOX1
tan	DUOX2
tan	DUOXA1
tan	DUOXA2
tan	ECM1
tan	EHD3
tan	EIF4A2
tan	EIF5B
tan	ELOVL6
tan	EPHA2
tan	EPN3
tan	EPS8L2
tan	ERO1A
tan	ESRP2
tan	EVPL
tan	EXOC7
tan	FA2H
tan	FAAP100
tan	FAM129B
tan	FAM135A
tan	FAM162A
tan	FAM214A
tan	FAM222B
tan	FAM83D
tan	FARP2
tan	FBXL19
tan	FBXL5
tan	FDXR
tan	FGF12
tan	FIBCD1
tan	FILIP1
tan	FLG
tan	FZD5
tan	GALNT3
tan	GAN
tan	GCNT3
tan	GFOD2
tan	GGT6
tan	GIGYF2
tan	GLTP
tan	GM2A
tan	GRAMD1A
tan	GRB2
tan	GRHL3
tan	HDAC5
tan	HEXIM1
tan	HIF1A
tan	HSPA4L
tan	HSPB1
tan	HYAL1
tan	IBTK
tan	IL18
tan	IL1RN
tan	IL36G
tan	IL36RN
tan	ITPKC
tan	ITSN2
tan	IVL
tan	JUP
tan	KCTD3
tan	KIAA1551
tan	KIF3C
tan	LAD1
tan	LBH
tan	LGR4
tan	LINC01694
tan	LMO7
tan	LPAR5
tan	LPCAT4
tan	LRG1
tan	MALL
tan	MAST4
tan	METRNL
tan	MFSD5
tan	MFSD6
tan	MREG
tan	MSMO1
tan	MUC1
tan	MUC20
tan	MXD1
tan	MYO1E
tan	MYO6
tan	NCDN
tan	NEBL
tan	NPEPPS
tan	NR2F6
tan	NSF
tan	NT5C2
tan	NUAK2
tan	P2RY2
tan	PCDH1
tan	PI3
tan	PITPNC1
tan	PITX1
tan	PLCD3
tan	PLCXD1
tan	PLEKHA7
tan	PLEKHH3
tan	PLS1
tan	PREP
tan	PRKCH
tan	PRPSAP1
tan	PRSS22
tan	PRSS27
tan	PSD4
tan	PTPRH
tan	QSOX1
tan	RAB10
tan	RAB25
tan	RAB5B
tan	RAF1
tan	RASAL1
tan	REEP6
tan	RHOG
tan	RHOV
tan	RPS6KB1
tan	S100A10
tan	S100A11
tan	S100A12
tan	S100A14
tan	S100A16
tan	S100A6
tan	SASH1
tan	SCEL
tan	SDC1
tan	SDCBP2
tan	SEC14L1
tan	SERPINB1
tan	SERPINB5
tan	SERPINB6
tan	SERPINB8
tan	SERPINI1
tan	SERTAD2
tan	SGPP2
tan	SIRT7
tan	SLC16A9
tan	SLC26A9
tan	SLC27A4
tan	SLC52A3
tan	SLC6A14
tan	SLC9A3R1
tan	SMC6
tan	SOD2
tan	SPPL3
tan	SPRR1A
tan	SPRR1B
tan	SPRR3
tan	SQOR
tan	STMP1
tan	SULT2B1
tan	SYNGR2
tan	TBC1D8
tan	TGFA
tan	TGM1
tan	TIAM1
tan	TMC6
tan	TMC8
tan	TMEM30A
tan	TMEM30B
tan	TMEM45B
tan	TMEM79
tan	TOP1
tan	TP53INP2
tan	TRAK1
tan	TRPS1
tan	TTC9
tan	UNC13D
tan	USP32
tan	UXS1
tan	VAMP8
tan	VPS37B
tan	WDR45B
tan	WFDC12
tan	WWC1
tan	YOD1
tan	ZBTB7A
tan	ZNF185
tan	ZNF750
tan	ZNRF1
tan	ZSWIM4
violet	ADM
violet	ALOX12B
violet	ALS2CL
violet	ANKRD9
violet	ANO9
violet	ARC
violet	ASPG
violet	ASPRV1
violet	ATF3
violet	BAIAP2
violet	BICDL2
violet	C1QTNF12
violet	C4orf3
violet	C5orf51
violet	CALML5
violet	CDH16
violet	CDK10
violet	CEBPD
violet	CENPT
violet	CLIC3
violet	CLK3
violet	CNFN
violet	COMP
violet	COMTD1
violet	CYP4F22
violet	DDIT4
violet	DDX39B
violet	DEDD2
violet	DNAJB1
violet	DUSP1
violet	DUSP2
violet	DYNLL1
violet	EGR1
violet	EGR2
violet	ENGASE
violet	EPS8L1
violet	ERP44
violet	FAM25A
violet	FBXL6
violet	FOS
violet	GNAL
violet	HES1
violet	HIST1H1C
violet	HIST1H2AC
violet	HIST1H2BD
violet	HIST1H2BK
violet	HIST2H2BE
violet	HOPX
violet	HSPA1A
violet	HSPA1B
violet	HSPA6
violet	HSPB8
violet	IER2
violet	IER5
violet	IFNAR1
violet	IFNGR2
violet	IGFL2
violet	JUN
violet	JUND
violet	KAT2A
violet	KCNK7
violet	KDM7A-DT
violet	KIFC2
violet	KLK13
violet	KLK14
violet	KLK6
violet	KRT16P2
violet	KRT17
violet	LINC01527
violet	LOR
violet	LYNX1
violet	LYPD3
violet	LYPD5
violet	MPST
violet	MVD
violet	NAPRT
violet	NIPAL2
violet	NOC4L
violet	NXF1
violet	PAQR5
violet	PARP10
violet	PARP6
violet	PHLDB3
violet	PLA2G4E
violet	PLEKHG5
violet	PPP1R15A
violet	RGL2
violet	RGS16
violet	RGS2
violet	RHCG
violet	SBSN
violet	SEC61G
violet	SON
violet	SPINK7
violet	SUCLA2
violet	SYT8
violet	TMEM184A
violet	TMEM50B
violet	TNFRSF25
violet	TNNT2
violet	UBC
violet	WSB1
violet	ZFP36
lightcyan	ABHD17C
lightcyan	AC092490.1
lightcyan	ACOX3
lightcyan	ADNP
lightcyan	AEBP2
lightcyan	AFF1
lightcyan	AGO1
lightcyan	AHR
lightcyan	ALDH1A3
lightcyan	ANKRD13A
lightcyan	ANXA11
lightcyan	AP1G1
lightcyan	AQP3
lightcyan	AQR
lightcyan	ARAP2
lightcyan	ARFGEF2
lightcyan	ARHGAP23
lightcyan	ARHGAP32
lightcyan	ARID1A
lightcyan	ASCC3
lightcyan	ATE1
lightcyan	ATP13A4
lightcyan	ATP2A2
lightcyan	AVL9
lightcyan	BACH1
lightcyan	BCAS1
lightcyan	C12orf49
lightcyan	C15orf39
lightcyan	CAPN14
lightcyan	CCDC120
lightcyan	CCDC186
lightcyan	CD177
lightcyan	CEACAM5
lightcyan	CEACAM6
lightcyan	CEACAM7
lightcyan	CHD9
lightcyan	CHP1
lightcyan	CLCA4
lightcyan	CLIP1
lightcyan	CLOCK
lightcyan	CNOT1
lightcyan	CPA3
lightcyan	CPEB4
lightcyan	CPNE3
lightcyan	CROT
lightcyan	CRYBG3
lightcyan	CSF3R
lightcyan	CSK
lightcyan	CTNND1
lightcyan	CTR9
lightcyan	CXCL1
lightcyan	CXCL6
lightcyan	DENND2C
lightcyan	DHCR24
lightcyan	DIDO1
lightcyan	DNAJC5
lightcyan	DOP1B
lightcyan	DUSP16
lightcyan	EEA1
lightcyan	EIF4G2
lightcyan	EMP1
lightcyan	EPB41L1
lightcyan	EPPK1
lightcyan	ERBB3
lightcyan	ERC1
lightcyan	ESRP1
lightcyan	FAM160A1
lightcyan	FAM83C
lightcyan	FAM84B
lightcyan	FBRS
lightcyan	FRK
lightcyan	FUT2
lightcyan	FUT6
lightcyan	GALNT5
lightcyan	GBF1
lightcyan	GID8
lightcyan	GNE
lightcyan	GOT2
lightcyan	GRHL1
lightcyan	HCAR2
lightcyan	HERC2
lightcyan	HIF1AN
lightcyan	HIPK1
lightcyan	HOOK1
lightcyan	IGHV2-26
lightcyan	IKZF2
lightcyan	ITGB8
lightcyan	ITIH5
lightcyan	KAZN
lightcyan	KRT24
lightcyan	KRT4
lightcyan	KRT80
lightcyan	LCN2
lightcyan	LCOR
lightcyan	LETM1
lightcyan	LPCAT3
lightcyan	LRMP
lightcyan	LRRC8B
lightcyan	LTA4H
lightcyan	LYN
lightcyan	LYPD2
lightcyan	LYPLA1
lightcyan	MACC1
lightcyan	MAL2
lightcyan	MAN1A2
lightcyan	MAP3K5
lightcyan	MAP3K9
lightcyan	MARK2
lightcyan	MASP1
lightcyan	MPZL2
lightcyan	MPZL3
lightcyan	MSLN
lightcyan	MTHFR
lightcyan	MTMR4
lightcyan	MUC16
lightcyan	MUC21
lightcyan	MUC4
lightcyan	MVK
lightcyan	MYO5B
lightcyan	MYO9A
lightcyan	NBEAL2
lightcyan	NBN
lightcyan	NCOA6
lightcyan	NELFCD
lightcyan	NLRP7
lightcyan	NLRX1
lightcyan	NUMBL
lightcyan	NUS1
lightcyan	OBSL1
lightcyan	OSBPL2
lightcyan	PADI1
lightcyan	PDCD4
lightcyan	PDS5A
lightcyan	PDXDC1
lightcyan	PGM2
lightcyan	PIK3C2B
lightcyan	PKN2
lightcyan	PLBD1
lightcyan	PLEKHG6
lightcyan	PLXNA2
lightcyan	PPL
lightcyan	PRDM1
lightcyan	PSCA
lightcyan	PTPN13
lightcyan	PUM1
lightcyan	PURB
lightcyan	RAB11A
lightcyan	RAB11FIP1
lightcyan	RAB27B
lightcyan	RALGAPB
lightcyan	RASGRP1
lightcyan	RBL2
lightcyan	RBM12
lightcyan	RBM47
lightcyan	RBMXL1
lightcyan	RELCH
lightcyan	RPRD1B
lightcyan	RREB1
lightcyan	SCAMP2
lightcyan	SEC24A
lightcyan	SEC24C
lightcyan	SERPINB11
lightcyan	SERPINB3
lightcyan	SGK1
lightcyan	SH3BGRL2
lightcyan	SHOC2
lightcyan	SLC11A2
lightcyan	SLC12A6
lightcyan	SLC18B1
lightcyan	SLC35D1
lightcyan	SLC6A9
lightcyan	SLC8B1
lightcyan	SLC9A8
lightcyan	SLK
lightcyan	SMAGP
lightcyan	SMIM14
lightcyan	SORD
lightcyan	SPATA20
lightcyan	SPINK5
lightcyan	SPINT1
lightcyan	ST6GALNAC1
lightcyan	STAU1
lightcyan	TACC2
lightcyan	TACSTD2
lightcyan	TCEA1
lightcyan	TET2
lightcyan	THEM6
lightcyan	TJP1
lightcyan	TM7SF2
lightcyan	TMEM33
lightcyan	TMPRSS11A
lightcyan	TMPRSS11E
lightcyan	TMPRSS4
lightcyan	TPCN1
lightcyan	TRIM29
lightcyan	TRIM33
lightcyan	TRIM44
lightcyan	TRNP1
lightcyan	TSPAN1
lightcyan	UBE3A
lightcyan	URB1
lightcyan	USO1
lightcyan	USP7
lightcyan	VAMP5
lightcyan	VNN1
lightcyan	VPS13D
lightcyan	VPS26A
lightcyan	VSIR
lightcyan	WFDC21P
lightcyan	WWP2
lightcyan	ZCCHC14
lightcyan	ZDHHC13
lightcyan	ZDHHC5
lightcyan	ZMYM4
lightcyan	ZNF770
